# Supplementary material
Source: PubMed Central journal article supplement (PMC3141222)
Supplement: halms528166-supplement_1.pdf [file halms528166-supplement_1.pdf]

# Figure S1

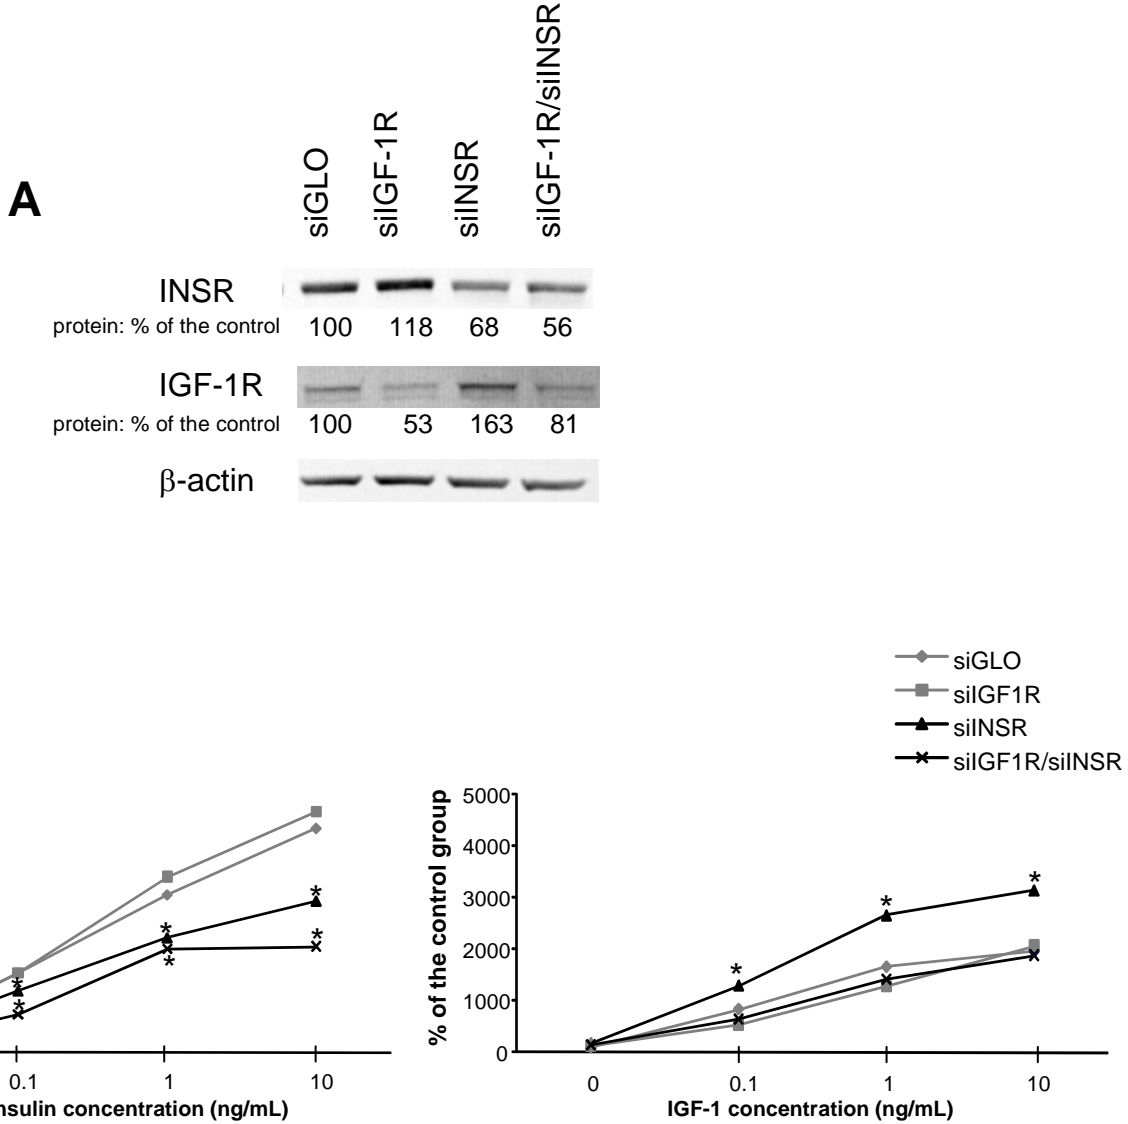

**Figure S1.** XG-2 cells were transfected with 1 nM SMARTpool of siRNAs to INSR (siINSR) or IGF-1R (siIGF-1R) or 1 nM non-targeting siRNA (siGLO) as reported<sup>16</sup>. At day 2 after electroporation (A) INSR, IGF-1R or β-actin protein expression was investigated by western blot (B) cells were plated at 10<sup>5</sup> cells/ml in Syn-H culture medium without or with graded concentrations of insulin or IGF-1 to assay for 4 days. Data are the mean percentages ± SD of the luminescent signal obtained with cells transfected with siRNA without or with insulin or IGF-1 compared to that obtained with cells transfected with siGLO without cytokine. \* indicates that Student *t* test was significant ( $P \leq .05$ ).

inserm-00528166, N° 21 Oct 2010
